# Supplementary material for: A bacterial route for folic acid supplementation
Source: PubMed Central journal article supplement (PMC6002978; doi:10.1186/s12915-018-0534-3), 2018-06-15

Supplementary Figure 1

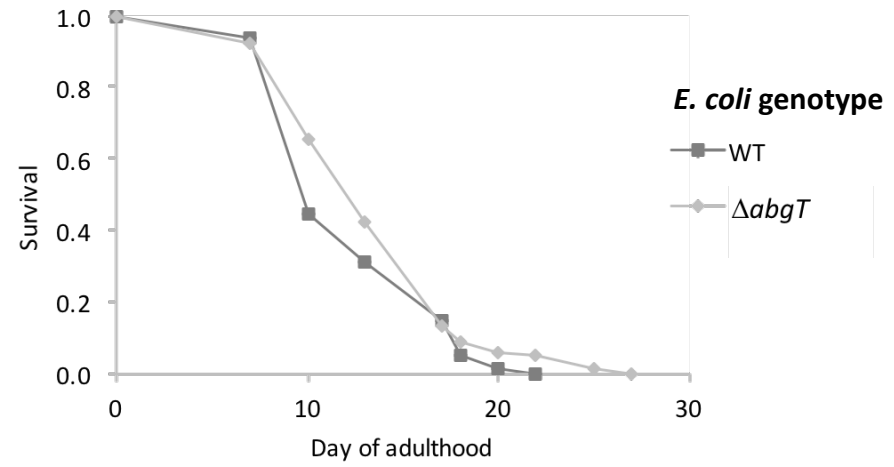

Supplement: 12915_2018_534_MOESM2_ESM.pdf [file 12915_2018_534_MOESM2_ESM.pdf]
